# Supplementary material for: Exosomes Derived from miR-143-Overexpressing MSCs Inhibit Cell Migration and Invasion in Human Prostate Cancer by Downregulating TFF3
Source: PubMed Central journal article supplement — Mol Ther Nucleic Acids. 2019 Aug 16;18:232–44. doi: 10.1016/j.omtn.2019.08.010 (PMC6796755; doi:10.1016/j.omtn.2019.08.010), 2019-08-16
Supplement: mmc1.pdf [file mmc1.pdf]

**OMTN, Volume 18**

**Supplemental Information**

**Exosomes Derived from miR-143-Overexpressing**

**MSCs Inhibit Cell Migration and Invasion**

**in Human Prostate Cancer by Downregulating TFF3**

**Yuanyuan Che, Xu Shi, Yunpeng Shi, Xiaoming Jiang, Qing Ai, Ying Shi, Fengyan Gong, and Wenyan Jiang**

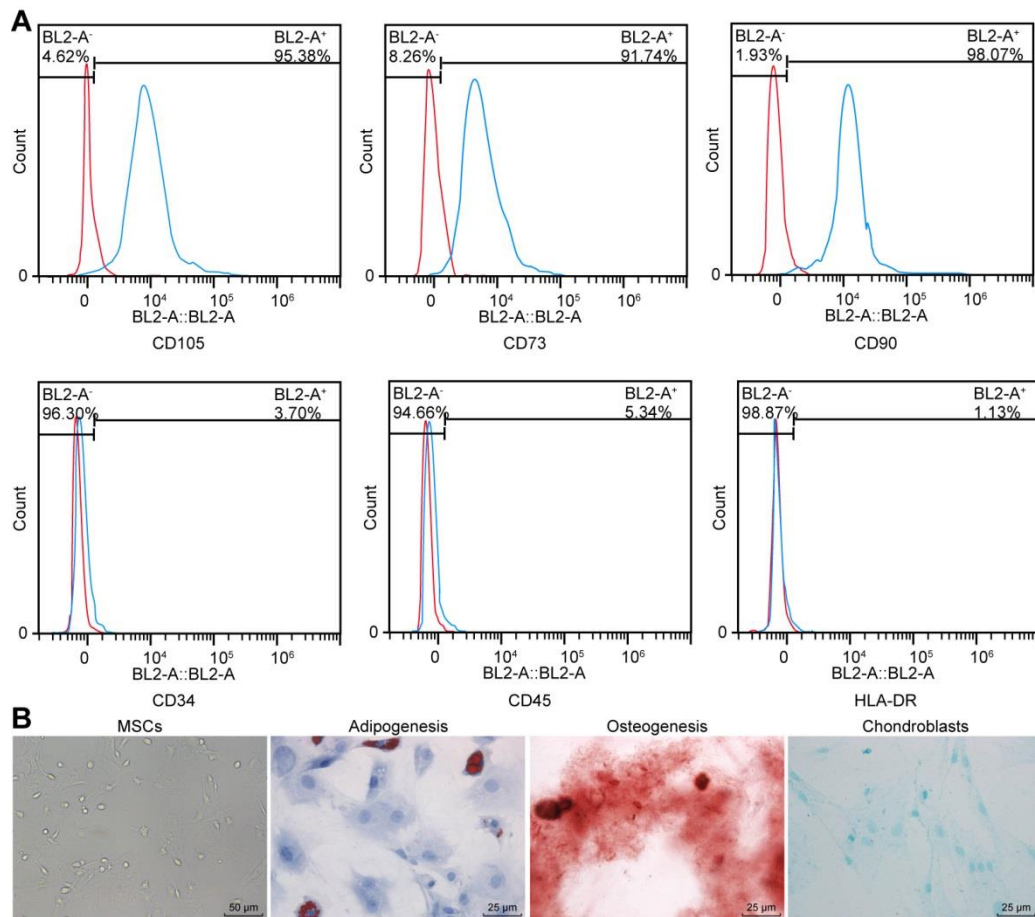

**Supplementary figure 1.** Identification of BMSCs. A. BMSCs characterization detected using flow cytometry; the cells were positive for CD105, CD73 and CD90 and negative for CD34, HLA-DR and CD45. B, representative images of BMSCs under the light microscope (scale bar = 50  $\mu$ m); adipogenic (left), osteogenic (middle) and chondroblasts (right) differentiation abilities measured using Oil Red O staining and Alizarin Red staining (scale bar = 25  $\mu$ m). BMSCs, human bone-marrow derived mesenchymal stem cells.
